# Supplementary material
Source: bioRxiv or medRxiv preprint supplement (https://www.biorxiv.org/highwire/filestream/120727/field_highwire_adjunct_files/0/398792-1.pdf)
Supplement: Supplementary file [file 398792-1.pdf]

# **Nucleosome dynamics of human iPSC during the early stages of neurodevelopment**

Janet C Harwood<sup>1</sup>, Nicholas A Kent<sup>1</sup>, Nicholas D Allen<sup>1</sup> and Adrian J Harwood<sup>1,2\*</sup>

**SUPPLEMENTAL INFORMATION**

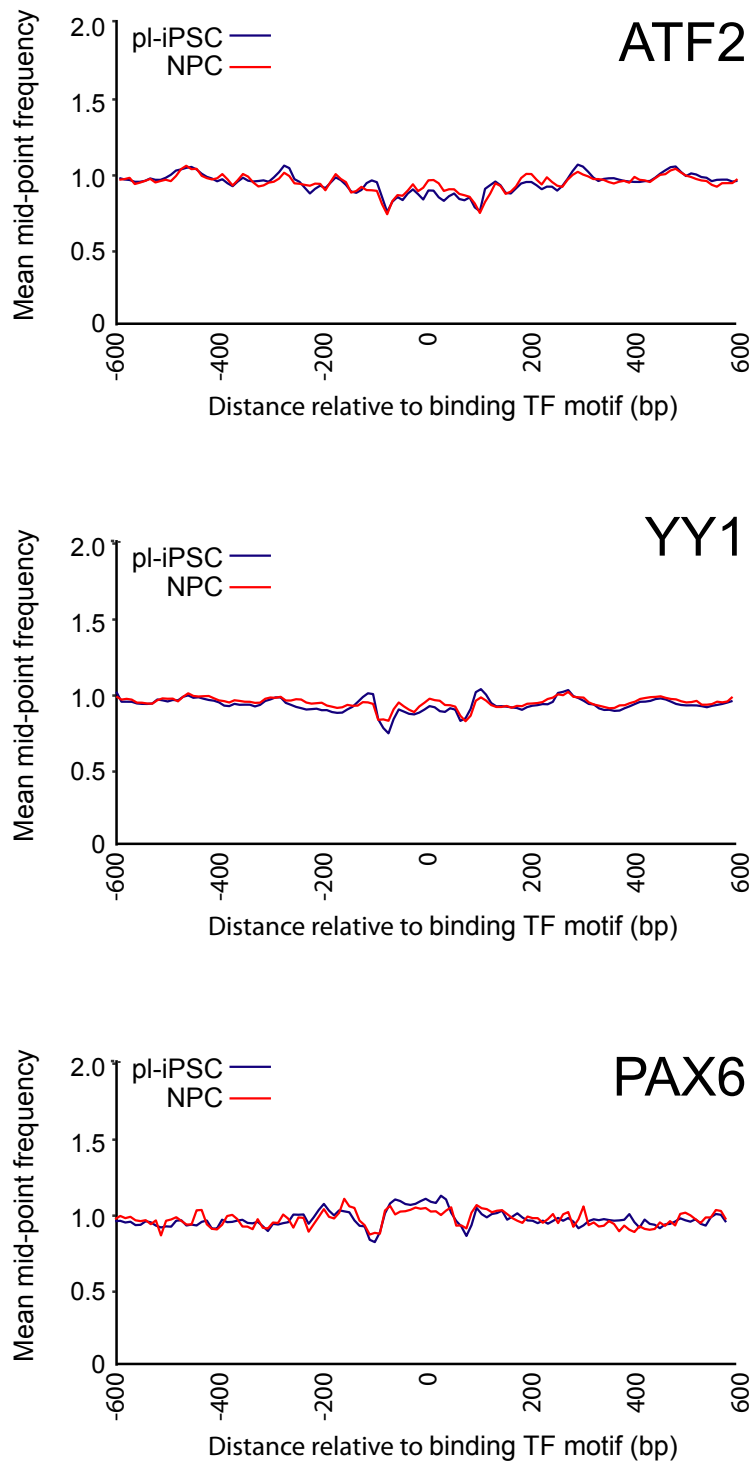

**Fig S1 Nucleosomes are not positioned at several transcription factor binding sites that are involved neurodevelopment.**

Average frequency distribution for sequence read mid-point data at and surrounding transcription factor binding sites ( $\pm 600$  bp) for nucleosomes at A. ATF2 (n=9,881), B. YY1 (n=39,945) and C. PAX6 (n=1,432) binding sites.

**Table S1: Numbers of highly positioned nucleosomes detected.**

| <b>Cell type</b> | <b>No. of nucleosomes</b> |
|------------------|---------------------------|
| pl-iPSC          | 48,840                    |
| NPC              | 408,152                   |
| K562             | 363,784                   |
| GM12878          | 241,064                   |

**Table S2: Chromatin state calculations for nucleosomes** (see STAR\*METHODS)

|                   | iPS   | default    | p(default) | expected | O-E      | O-E/E | O-E/E*100 |
|-------------------|-------|------------|------------|----------|----------|-------|-----------|
| 1_Active_Promoter | 315   | 9649596    | 0.00       | 173.92   | 141.08   | 0.81  | 81.11     |
| 2_Weak_Promoter   | 547   | 17972821   | 0.01       | 323.94   | 223.06   | 0.69  | 68.86     |
| 3_Poised_Promoter | 188   | 18382770   | 0.01       | 331.33   | -143.33  | -0.43 | -43.26    |
| 4_Strong_Enhancer | 129   | 2625615    | 0.00       | 47.32    | 81.68    | 1.73  | 172.59    |
| 5_Strong_Enhancer | 380   | 7027601    | 0.00       | 126.67   | 253.33   | 2.00  | 200.00    |
| 6_Weak_Enhancer   | 1517  | 34587847   | 0.01       | 623.41   | 893.59   | 1.43  | 143.34    |
| 7_Weak_Enhancer   | 1312  | 65853579   | 0.02       | 1186.95  | 125.05   | 0.11  | 10.54     |
| 8_Insulator       | 2725  | 21846871   | 0.01       | 393.77   | 2331.23  | 5.92  | 592.03    |
| 9_Txn_Transition  | 551   | 25543545   | 0.01       | 460.40   | 90.60    | 0.20  | 19.68     |
| 10_Txn_Elongation | 591   | 81202908   | 0.03       | 1463.61  | -872.61  | -0.60 | -59.62    |
| 11_Weak_Txn       | 7385  | 496238486  | 0.19       | 8944.23  | -1559.23 | -0.17 | -17.43    |
| 12_Repressed      | 530   | 37571070   | 0.01       | 677.18   | -147.18  | -0.22 | -21.73    |
| 14_Repetitive/CNV | 1201  | 3946701    | 0.00       | 71.14    | 1129.86  | 15.88 | 1588.33   |
| 15_Repetitive/CNV | 2817  | 2216760    | 0.00       | 39.95    | 2777.05  | 69.50 | 6950.43   |
| 13_Heterochrom/lo | 28107 | 1854808938 | 0.69       | 33431.17 | -5324.17 | -0.16 | -15.93    |

**TableS3: Chromatin state calculations for CTCF sites.** (see STAR\*METHODS)

| Chromatin state             | Observed | p(default)  | Expected |
|-----------------------------|----------|-------------|----------|
| 1_Active_Promoter           | 160      | 0.003601301 | 34       |
| 2_Weak_Promoter             | 446      | 0.00670759  | 64       |
| 3_Poised_Promoter           | 437      | 0.006860586 | 65       |
| 4_Strong_Enhancer           | 25       | 0.000979899 | 9        |
| 5_Strong_Enhancer           | 66       | 0.002622753 | 25       |
| 6_Weak_Enhancer             | 748      | 0.012908441 | 123      |
| 7_Weak_Enhancer             | 167      | 0.024577045 | 234      |
| 8_Insulator                 | 6331     | 0.008153414 | 78       |
| 9_Txn_Transition            | 337      | 0.009533041 | 91       |
| 10_Txn_Elongation           | 134      | 0.030305528 | 288      |
| 11_Weak_Txn                 | 149      | 0.185199887 | 1762     |
| 12_Repressed                | 39       | 0.014021802 | 133      |
| 13_Heterochrom/lo           | 415      | 0.001472938 | 14       |
| 14_Repetitive/CNV           | 21       | 0.000827311 | 8        |
| 15_Repetitive/CNV           | 3        | 0.692228464 | 6587     |
|                             |          |             |          |
| TOTAL                       | 9478     | 1           | 9516     |
|                             |          |             |          |
| number of CTCF sites = 9516 |          |             |          |

**Table S4: Consensus transcription factor binding motif sequences used in this study.**

| Transcription factor | Consensus binding motif                                                               | Motif length |
|----------------------|---------------------------------------------------------------------------------------|--------------|
| ATF2                 | [T][G][A][C][G][T][C][A]                                                              | 8            |
| YY1                  | [A][A][G A C][A][T][G][G][C][G C T][G C A][C]                                         | 11           |
| PAX6                 | [A][T][T][C][A][T][G][C][A C G T][T][G][A]                                            | 12           |
| CTCF                 | [C][C][A G][C G][C T][A][G][G A][T G][G][G][C T]                                      | 12           |
| RE1                  | [A C G T][T][T C][A][G][A C][A G][C][C][A C G T]<br>[A C G T][A G][G][A C][G C][A][G] | 17           |
